# Supplementary material
Source: PubMed Central journal article supplement (PMC7127034)

Taipei

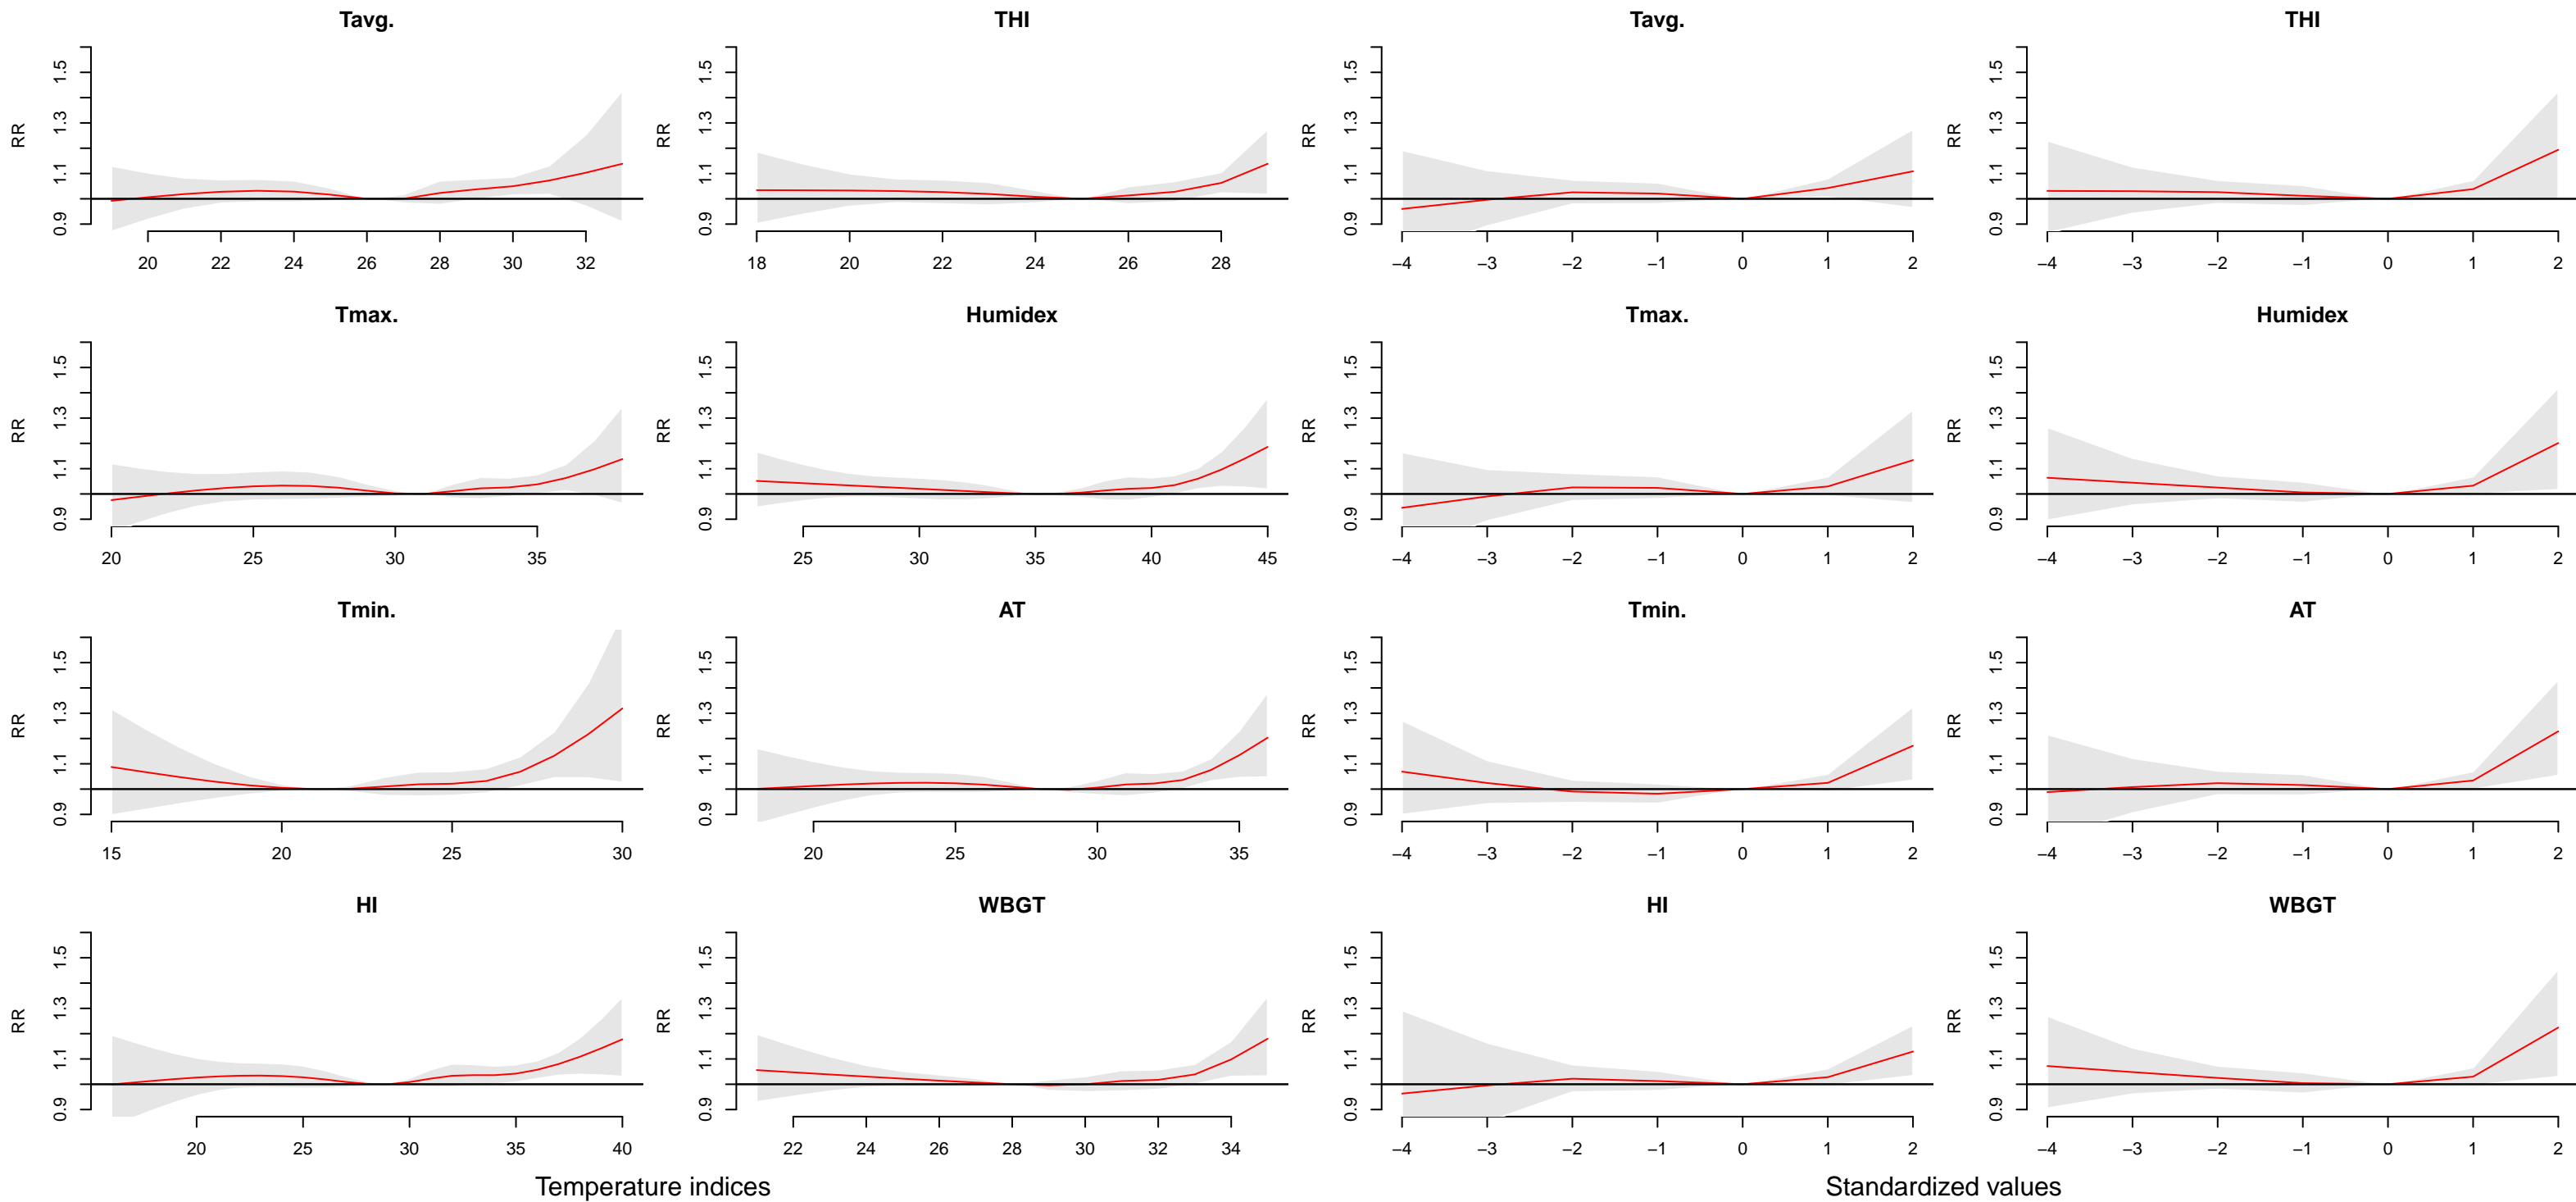

Supplement: mmc1.pdf [file mmc1.pdf]

# Central Taiwan

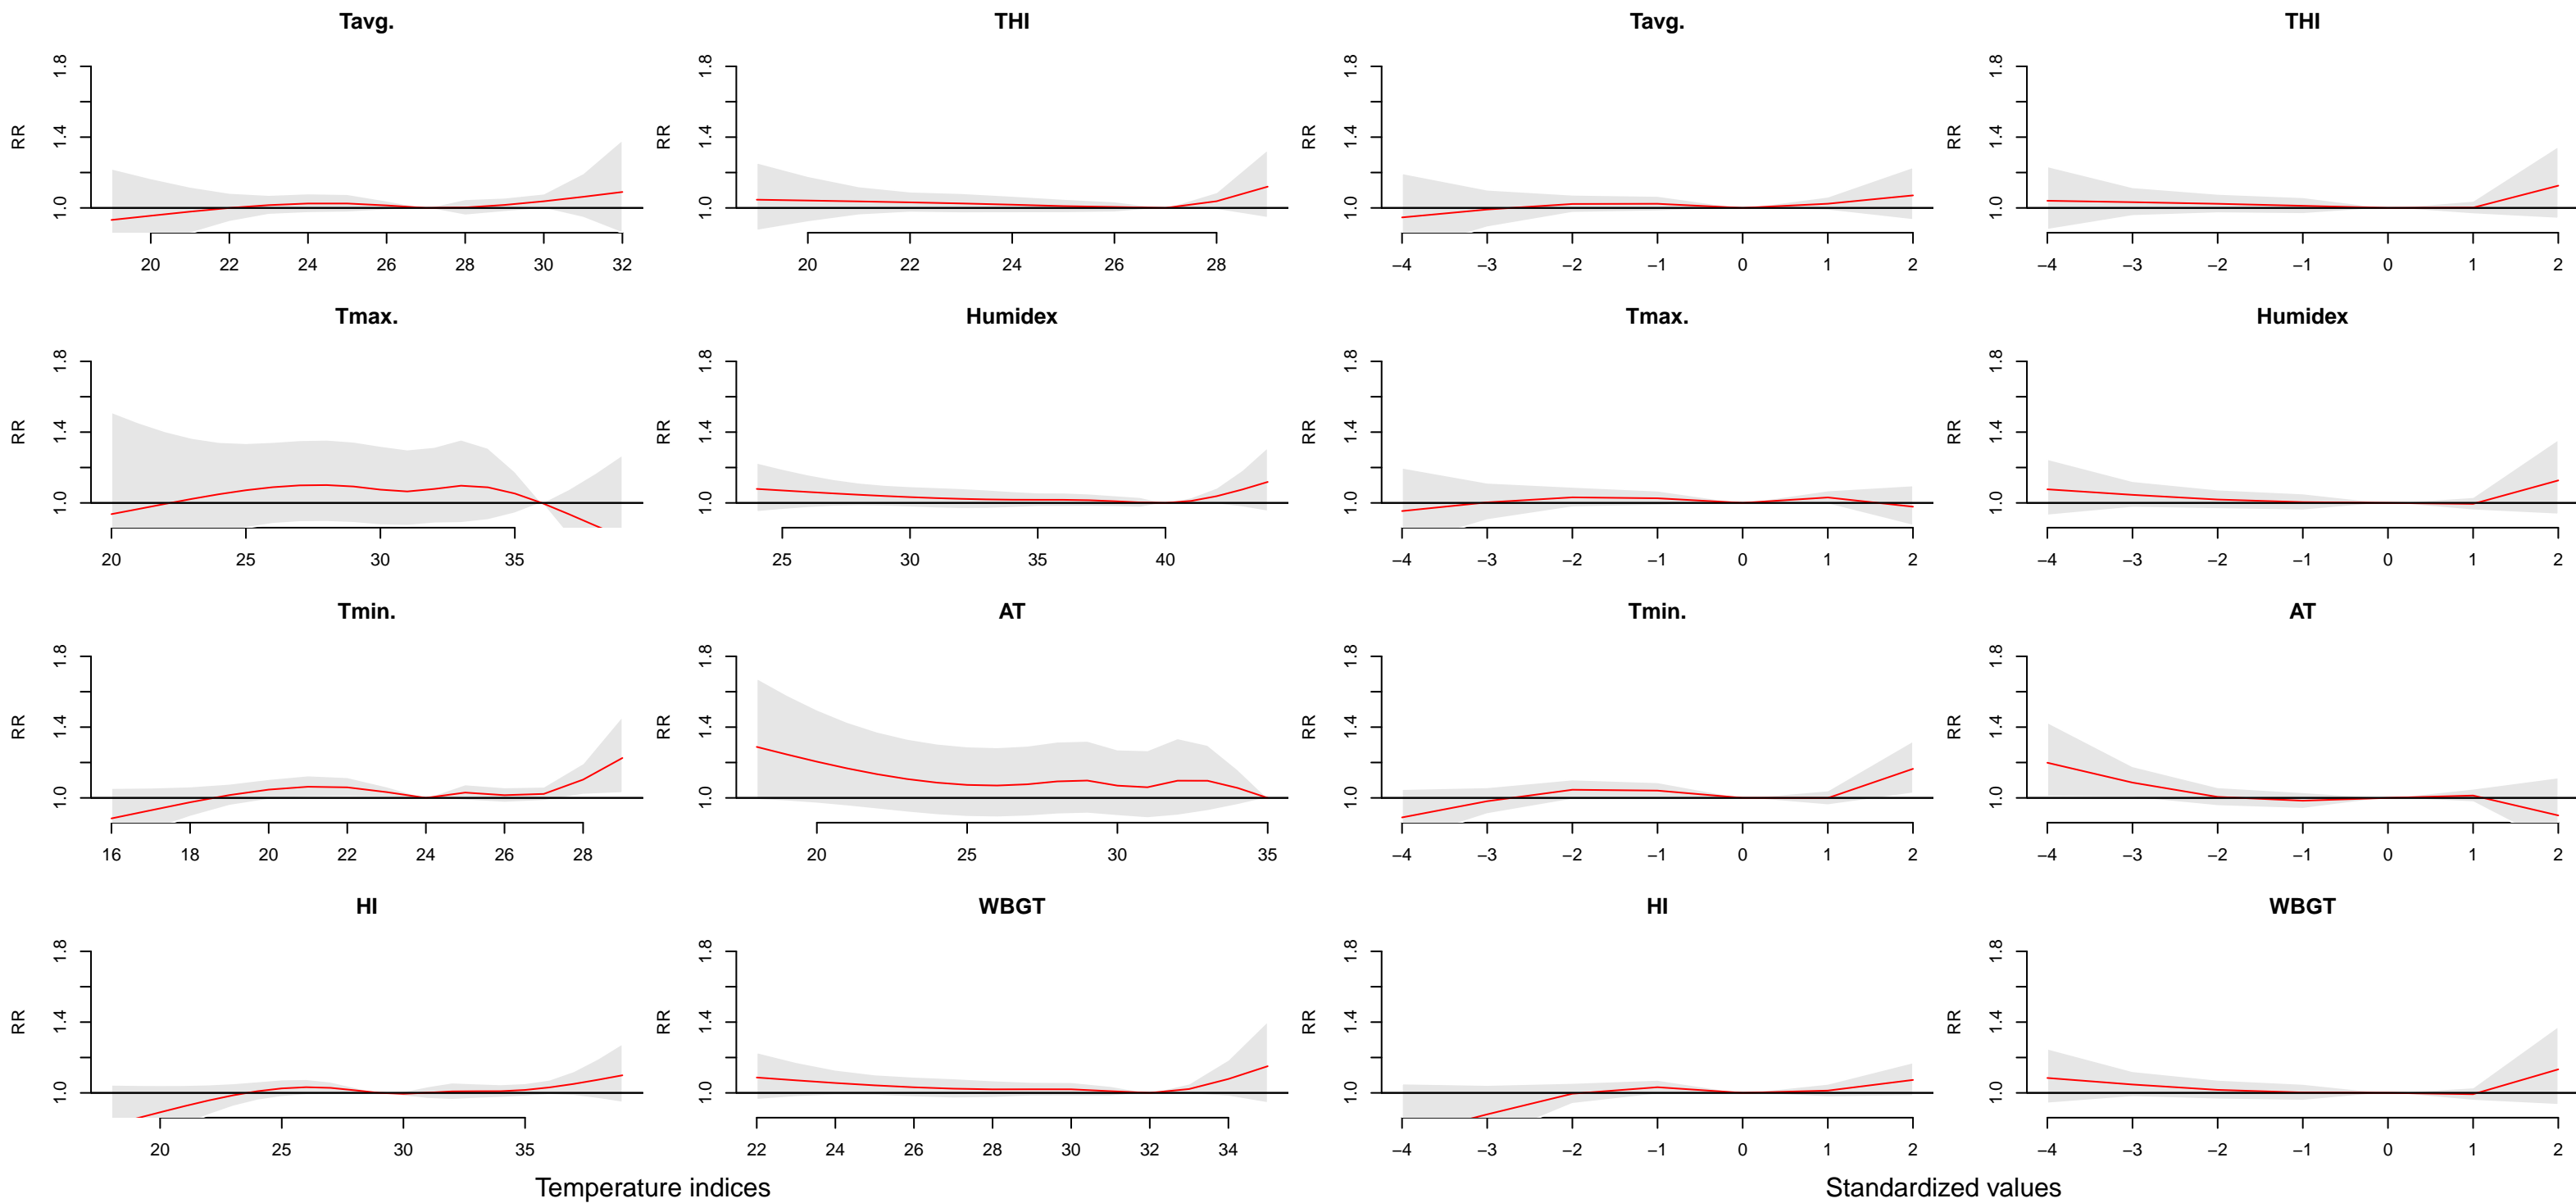

Supplement: mmc2.pdf [file mmc2.pdf]

Southern Taiwan

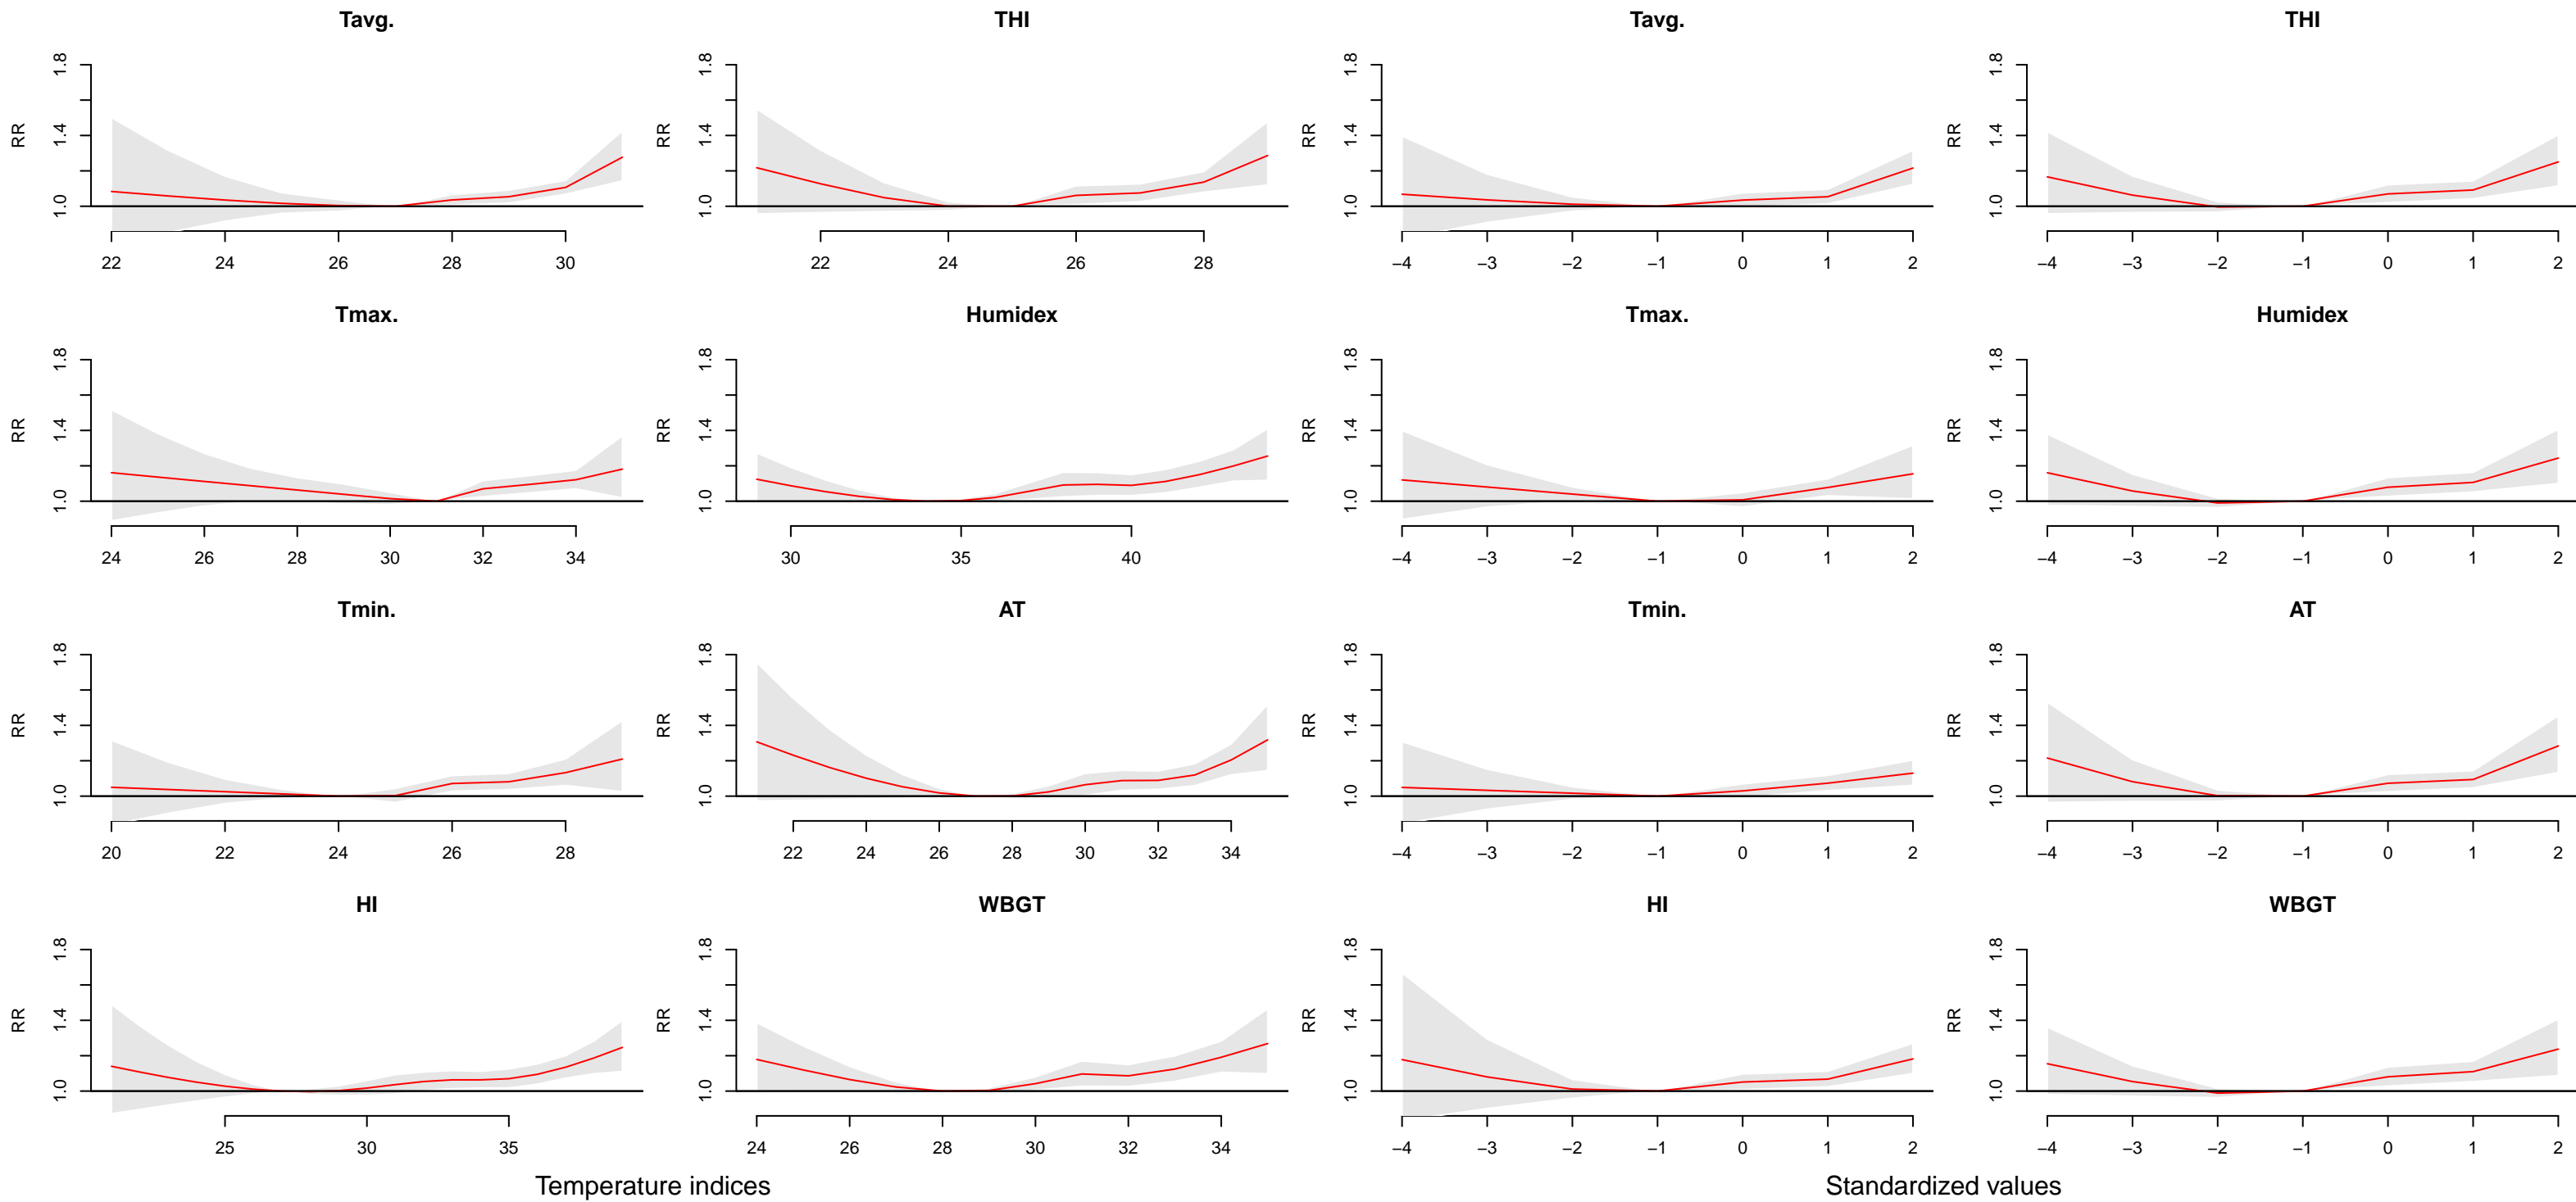

Supplement: mmc3.pdf [file mmc3.pdf]

Taipei

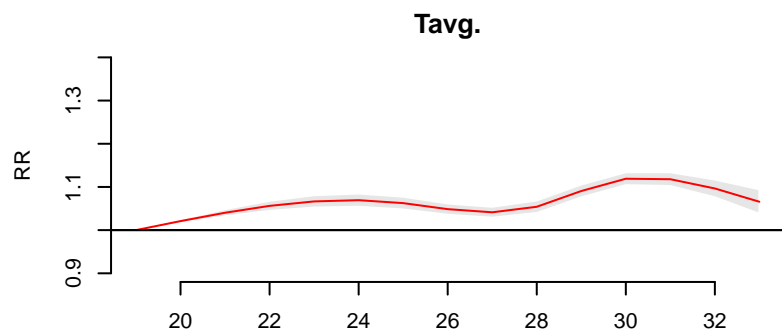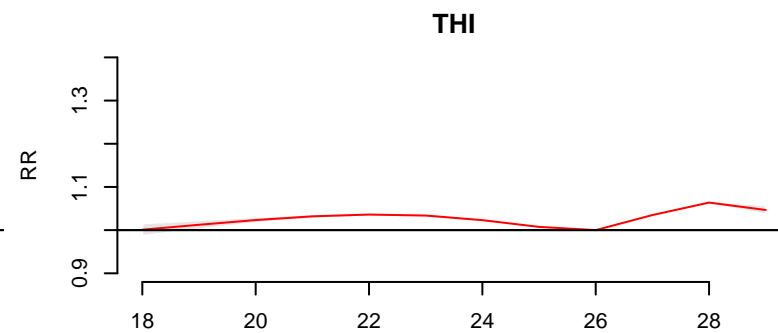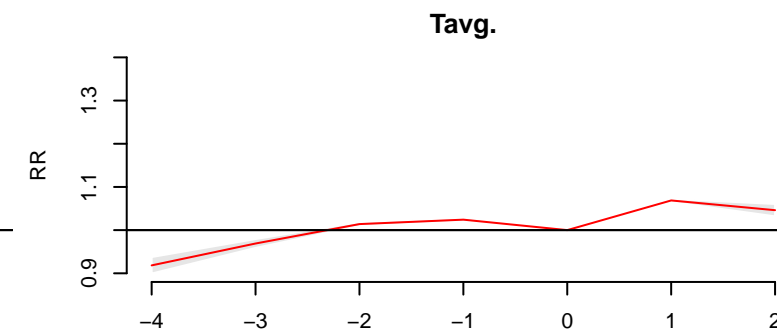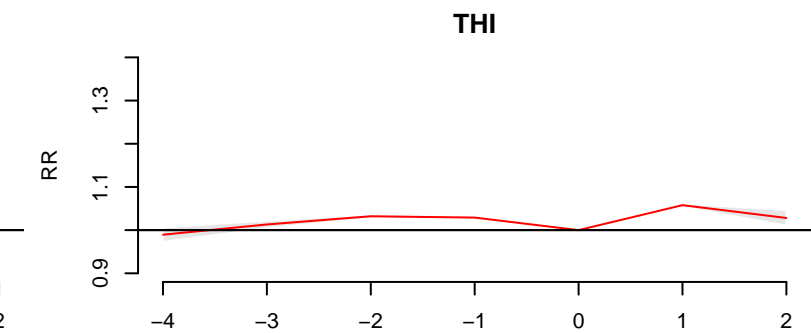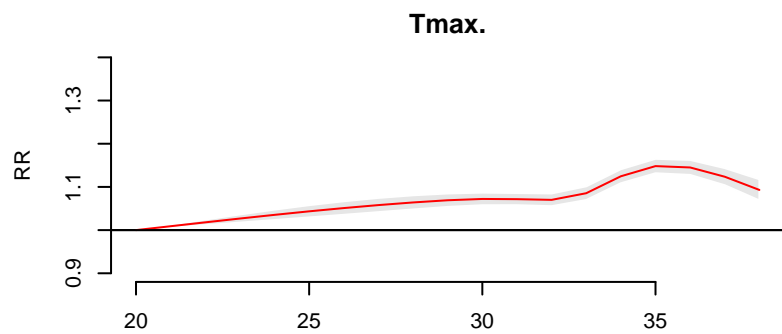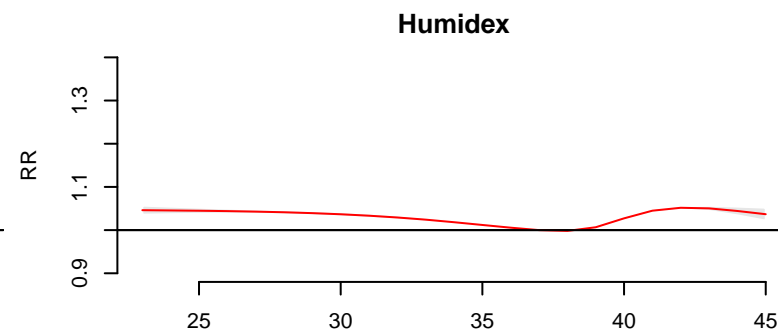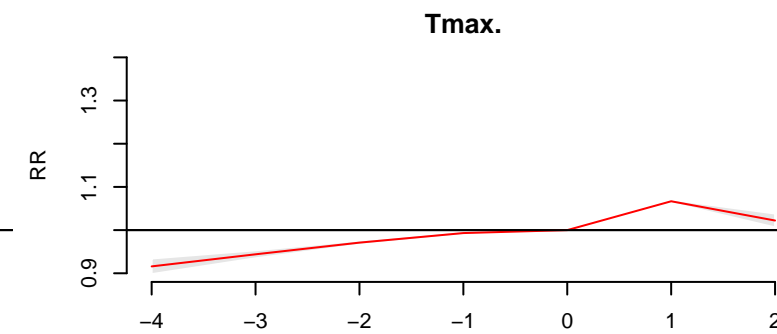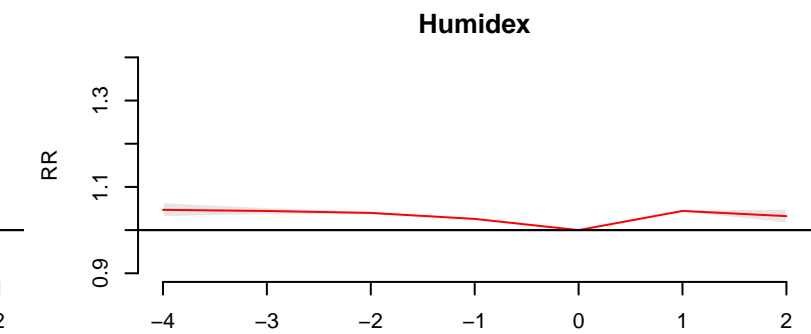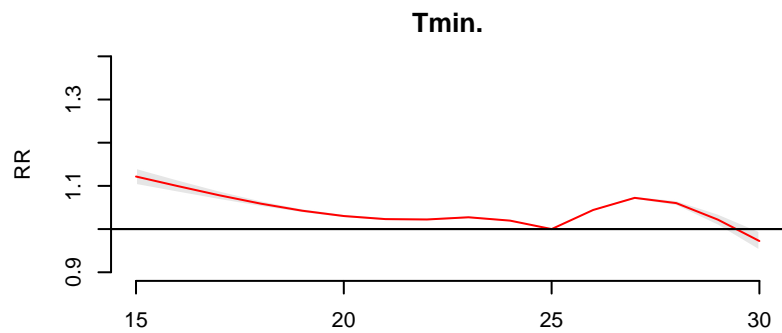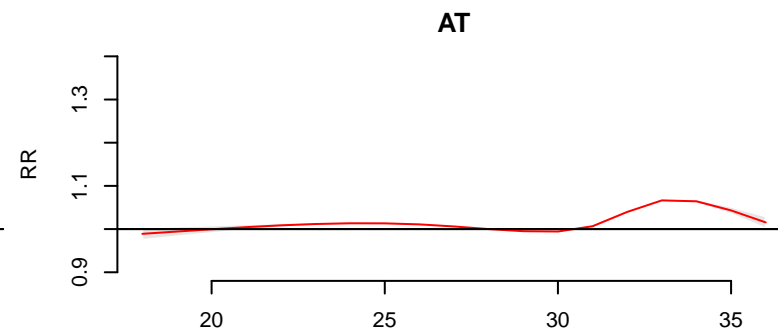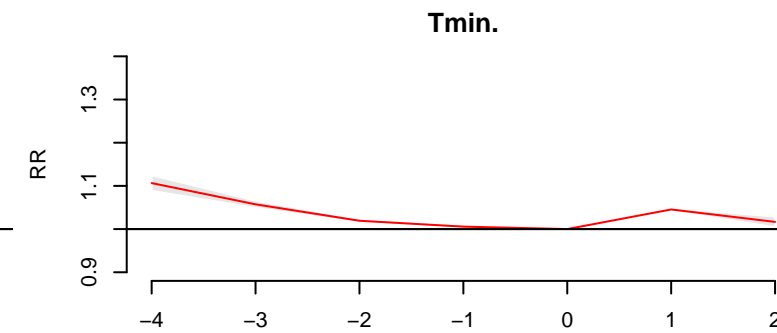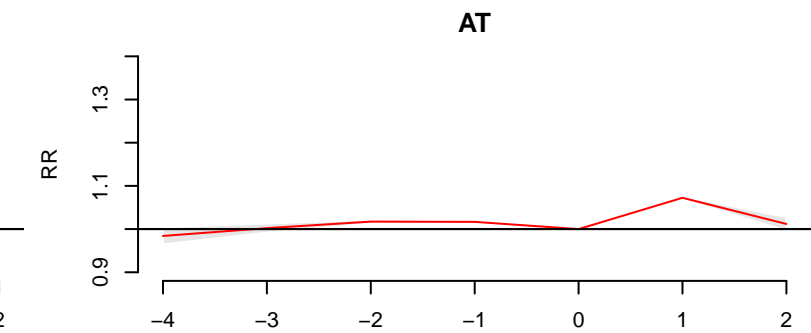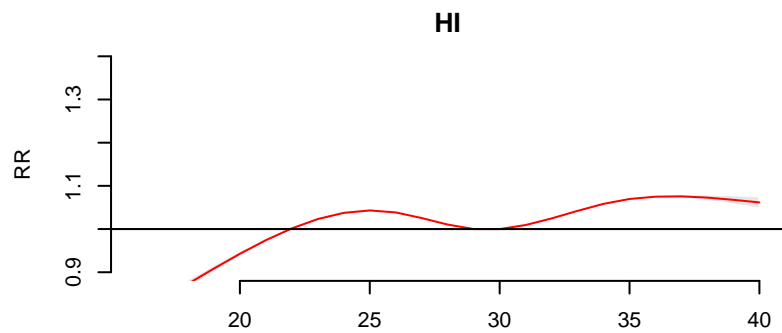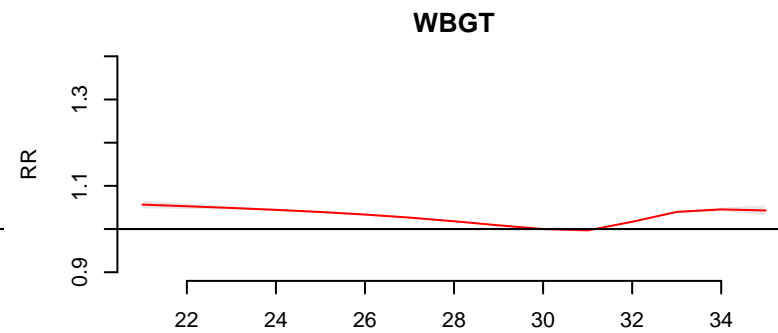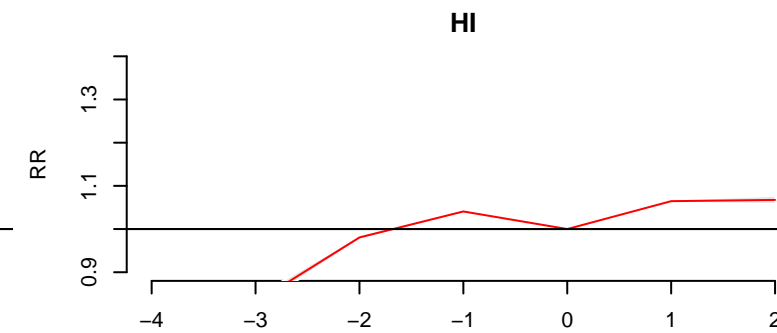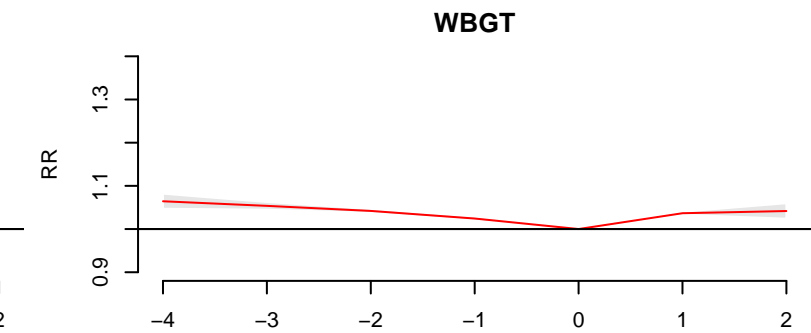

## Temperature indices

### Standardized values

Supplement: mmc4.pdf [file mmc4.pdf]

# Central Taiwan

Tavg.

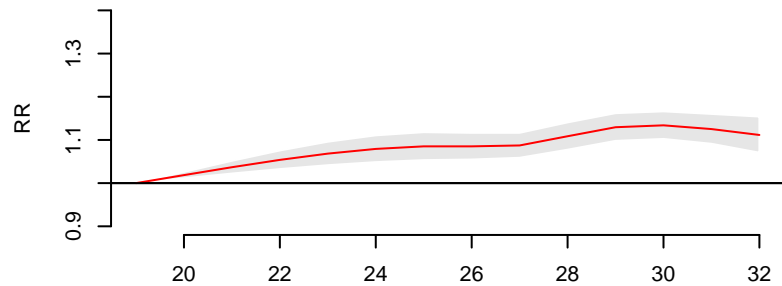

THI

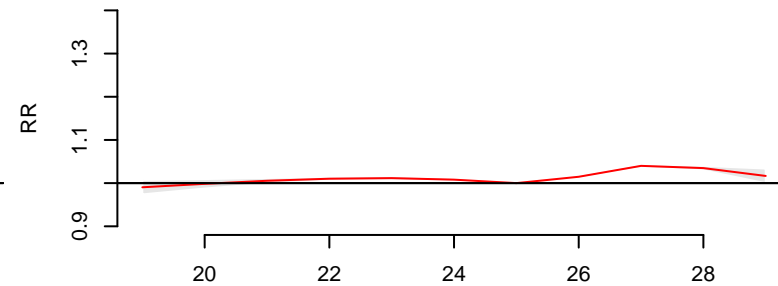

Tavg.

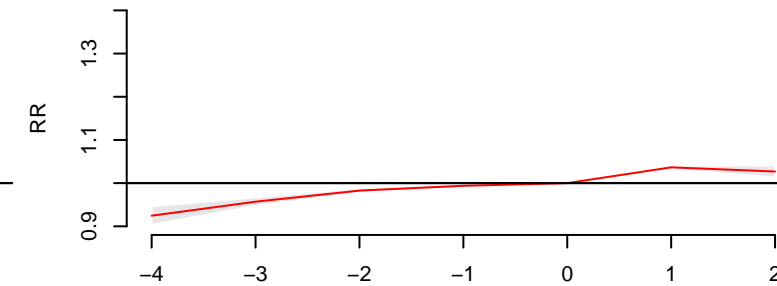

THI

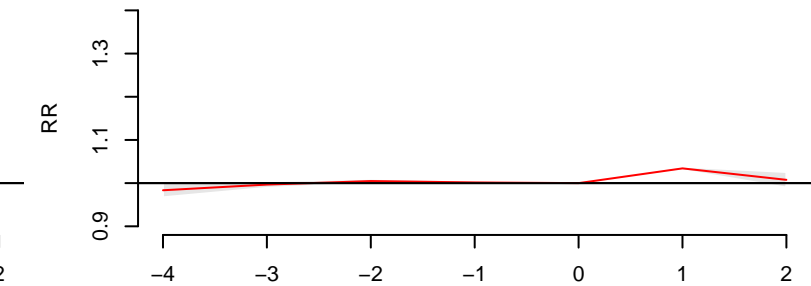

Tmax.

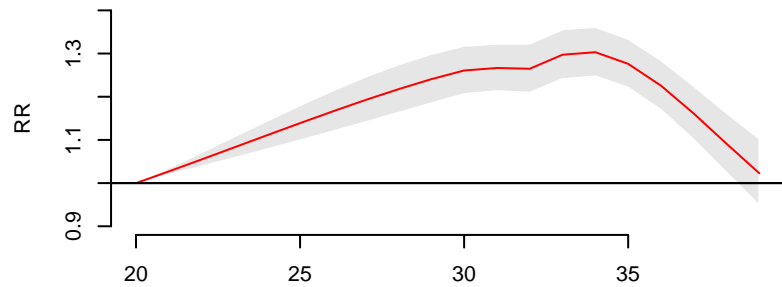

Humidex

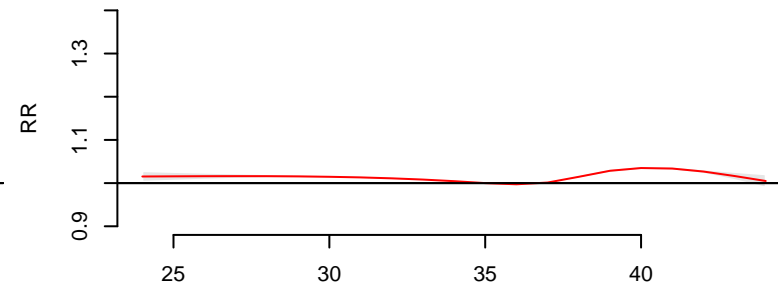

Tmax.

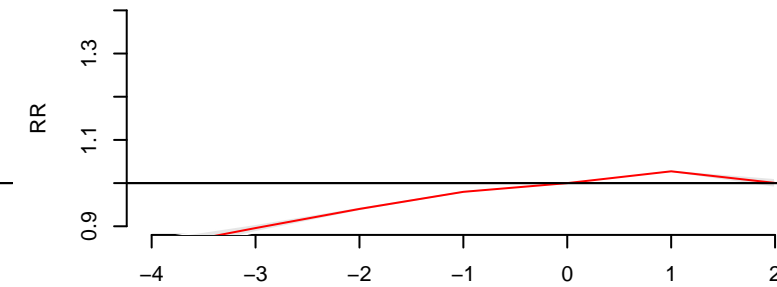

Humidex

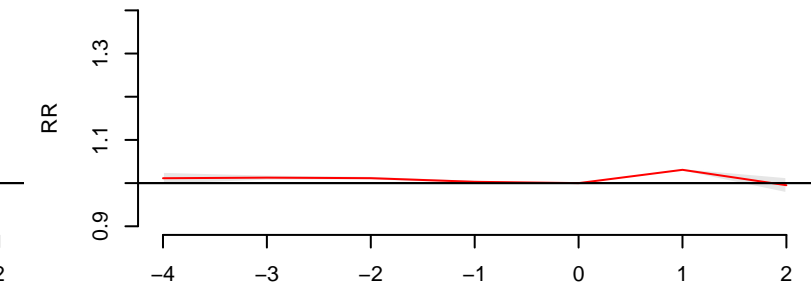

Tmin.

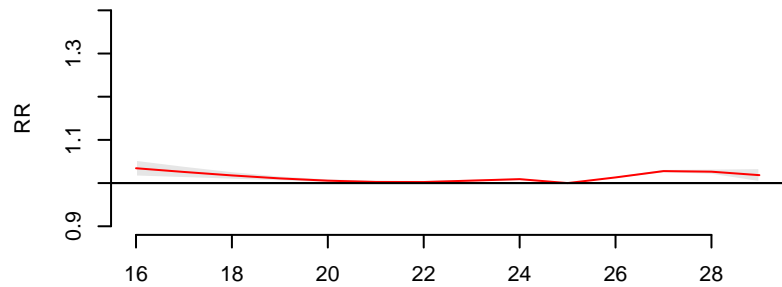

AT

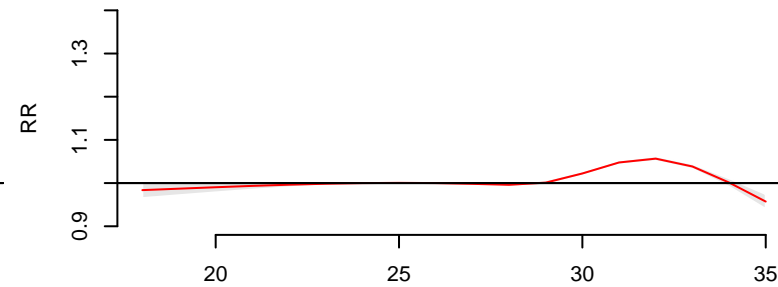

Tmin.

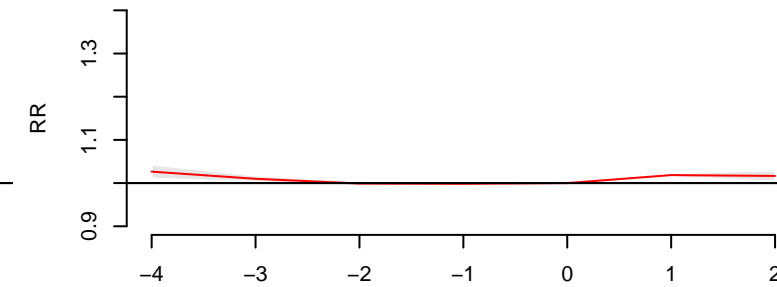

AT

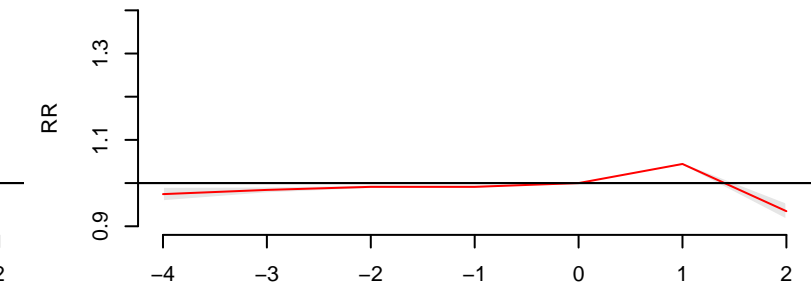

HI

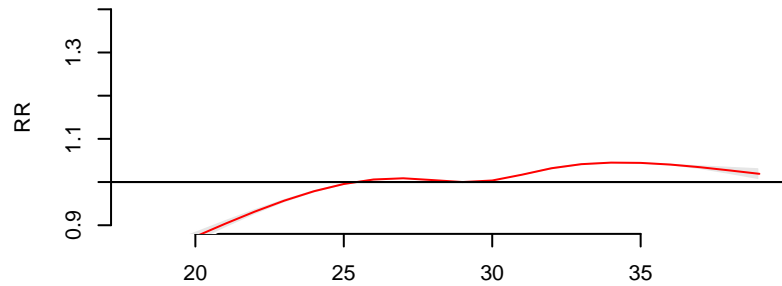

WBGT

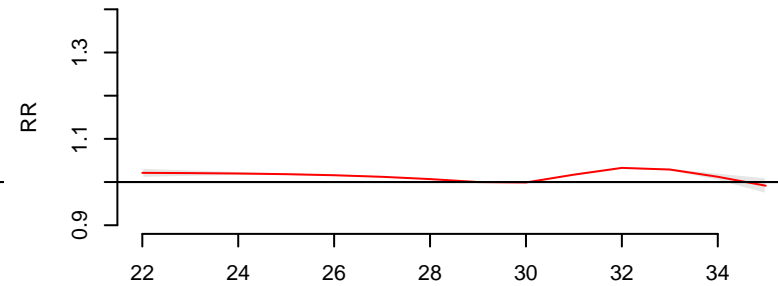

HI

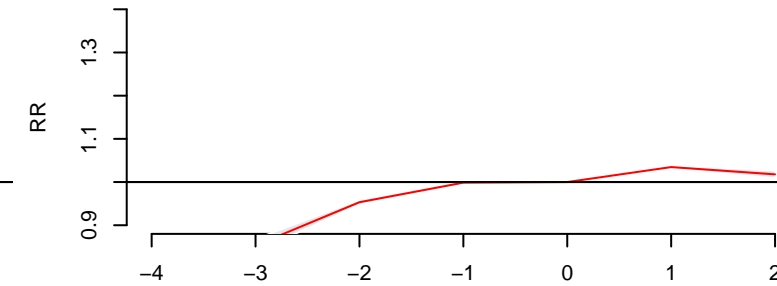

WBGT

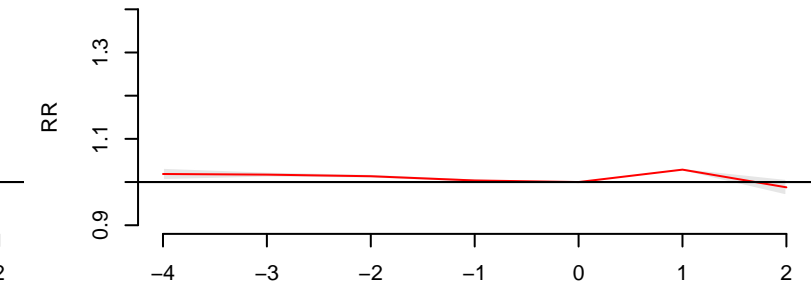

Supplement: mmc5.pdf [file mmc5.pdf]

Southern Taiwan

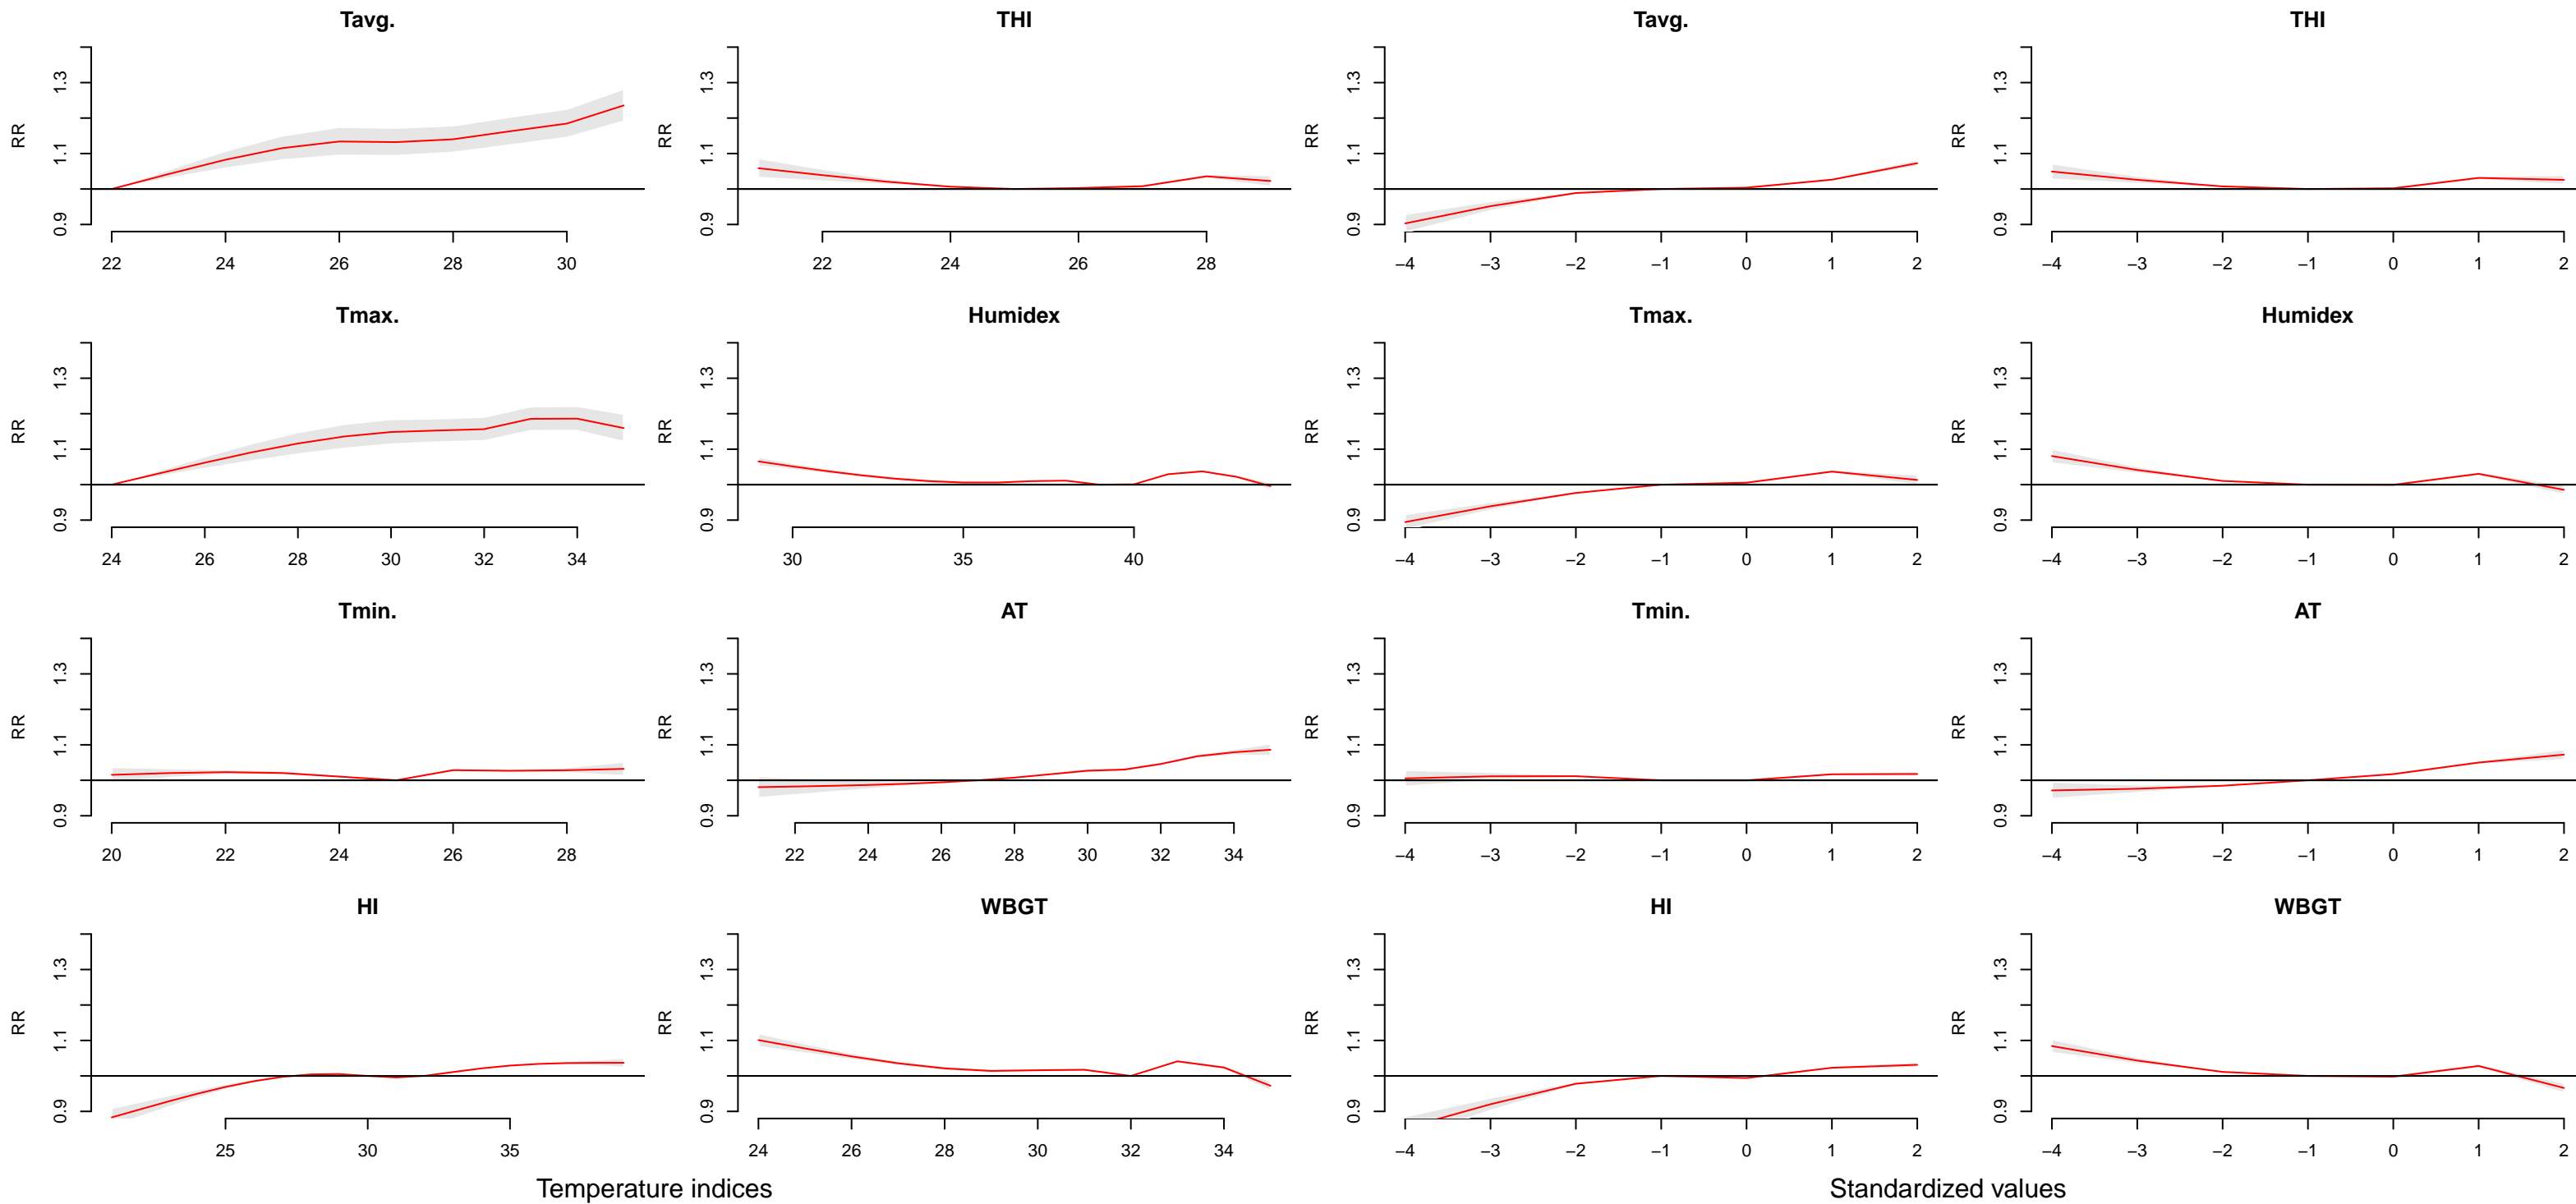

Supplement: mmc6.pdf [file mmc6.pdf]
